# Supplementary material for: Anwendbarkeit von QUIKS bei stationär konservativ behandelten Tumorpatienten
Source: Springer Nature journal article supplement (doi:10.1007/s00482-021-00599-6), 2021-10-27
Supplement: MOESM1 [file 19803140]

# QUIKS Prozess-Parameter

## DEMOGRAPHIE

D1 Nummer: \_\_\_\_\_ D5 Station: \_\_\_\_\_

D2 Geschlecht:  männlich  weiblich

D3 Alter:  18-20  21-30  31-40  41-50  51-60  
 61-70  71-80  81-90  91-100  über 100  nicht erhebbar

D4 Kalenderwoche Aufnahme: \_\_\_ \_\_\_ im Jahr: \_\_\_ \_\_\_ \_\_\_

### D6 Fachabteilung:

- Innere Medizin ohne Spezialisierung
- Kardiologie
- Gastroenterologie
- Nephrologie
- Pulmologie
- Rheumatologie
- Häm./ Onkologie
- Endokrinologie
- Neurologie
- Psychiatrie
- Psychosomatik
- Dermatologie
- Palliativmedizin
- sonstige: \_\_\_\_\_

### D7 Befragungstag nach stationärer Aufnahme:

1  2  3  4  5  6  7  nicht erhebbar

### D8 Einschluss des Patienten nicht möglich aus folgendem Grund:

- Patient befindet sich auf einer anderen Station
- Patient lehnt die Befragung ab
- Patient ist verwirrt/hat Verständnisschwierigkeiten
- Patient ist sediert / schläft  
falls ja, bitte auswählen:
  - leicht schläfrig
  - häufig müde, leicht erweckbar
  - tief schlafend, schwer erweckbar (Bitte unbedingt Prozessparameter erheben!)
  - nicht erweckbar (Bitte unbedingt Prozessparameter erheben!)
- Sonstige Gründe
- Patient ist nicht anwesend / bereits entlassen
- Patient hat bereits teilgenommen
- Patient spricht kein Deutsch

## FREIFELDER (für eigene Fragestellungen können Sie bis zu 8 Felder nutzen)

|    |    |
|----|----|
| F1 | F5 |
| F2 | F6 |
| F3 | F7 |
| F4 | F8 |

|                                                                                                                             |                                                                                                                                                                                |                                                               |                                                                                                                                                                  |                                                   |                                                                      |                                                           |                                                     |
|-----------------------------------------------------------------------------------------------------------------------------|--------------------------------------------------------------------------------------------------------------------------------------------------------------------------------|---------------------------------------------------------------|------------------------------------------------------------------------------------------------------------------------------------------------------------------|---------------------------------------------------|----------------------------------------------------------------------|-----------------------------------------------------------|-----------------------------------------------------|
| <b>H1 *<br/>Herz</b>                                                                                                        | <input type="checkbox"/> Endokarditis (infekt.)                                                                                                                                | <input type="checkbox"/> Endokarditis (rheum.)                | <input type="checkbox"/> Myokarditis                                                                                                                             | <input type="checkbox"/> Perikarditis             | <input type="checkbox"/> Herzklappeninsuff.                          | <input type="checkbox"/> Herzklappenstenose               | <input type="checkbox"/> sonst. Herzvittium         |
|                                                                                                                             | <input type="checkbox"/> Herzinsuffizienz                                                                                                                                      | <input type="checkbox"/> dekomp. Herzinsuff.                  | <input type="checkbox"/> ACS                                                                                                                                     | <input type="checkbox"/> trans. Herzinfarkt       | <input type="checkbox"/> KHK                                         | <input type="checkbox"/> prim. Rhythmusstörung            |                                                     |
| <b>H2 *<br/>Kreislauf</b>                                                                                                   | <input type="checkbox"/> art. Hypertonie                                                                                                                                       | <input type="checkbox"/> pulm. Hypertonie                     | <input type="checkbox"/> Synkope                                                                                                                                 | <input type="checkbox"/> Thrombose                | <input type="checkbox"/> Thrombophlebitis                            | <input type="checkbox"/> pAVK (ohne Ulcus, nicht akut)    | <input type="checkbox"/> per. Embolie               |
|                                                                                                                             | <input type="checkbox"/> Lungenembolie                                                                                                                                         | <input type="checkbox"/> Aneurysma                            | <input type="checkbox"/> Varikosis                                                                                                                               | <input type="checkbox"/> chron. ven. Insuffizienz | <input type="checkbox"/> Lymphödem /Angitis                          |                                                           |                                                     |
| <b>H3 *<br/>Magen/Darm</b>                                                                                                  | <input type="checkbox"/> Gastritis / Duodenitis                                                                                                                                | <input type="checkbox"/> Gastroenteritis                      | <input type="checkbox"/> Refluxösophagitis                                                                                                                       | <input type="checkbox"/> Sigmadivertikulitis      | <input type="checkbox"/> Appendizitis                                | <input type="checkbox"/> Colitis Ulcerosa                 | <input type="checkbox"/> M. Crohn                   |
| <b>H4<br/>Leber/Pankreas/Milz</b>                                                                                           | <input type="checkbox"/> Gallensteine                                                                                                                                          | <input type="checkbox"/> Cholezystitis                        | <input type="checkbox"/> akute Pankreatitis                                                                                                                      | <input type="checkbox"/> chron. Pankreatitis      | <input type="checkbox"/> Hepatitis                                   |                                                           |                                                     |
| <b>H5<br/>*Stoffwechsel/Hormone</b>                                                                                         | <input type="checkbox"/> Diabetes mellitus Typ 1                                                                                                                               | <input type="checkbox"/> Diabetes mellitus Typ 2              | <input type="checkbox"/> Hypothyreose                                                                                                                            | <input type="checkbox"/> Hyperthyreose            | <input type="checkbox"/> Erkrankungen der Nebenschilddrüse           | <input type="checkbox"/> Störungen des Aldosteronsystems  | <input type="checkbox"/> M. Cushing                 |
|                                                                                                                             | <input type="checkbox"/> Diabetes insipidus                                                                                                                                    | <input type="checkbox"/> Osteoporose                          | <input type="checkbox"/> Porphyrien                                                                                                                              | <input type="checkbox"/> Adipositas               | <input type="checkbox"/> Hyperurikämie (nicht akut)                  | <input type="checkbox"/> Gicht                            |                                                     |
| <b>H6 *<br/>Niere</b>                                                                                                       | <input type="checkbox"/> Nephritis (infekt.)                                                                                                                                   | <input type="checkbox"/> Nephritis (nicht infekt.)            | <input type="checkbox"/> Nierensteine                                                                                                                            | <input type="checkbox"/> Harnwegsinfekt           | <input type="checkbox"/> Niereninsuffizienz (ohne Dialyse)           | <input type="checkbox"/> Niereninsuffizienz (mit Dialyse) | <input type="checkbox"/> autoimmune Nephropathie    |
| <b>H7 *<br/>Lunge</b>                                                                                                       | <input type="checkbox"/> Asthma bronchiale                                                                                                                                     | <input type="checkbox"/> COPD/ obstruktive Lungenerkrankungen | <input type="checkbox"/> Lungenfibrose/ restriktive Lungenerkrankungen                                                                                           | <input type="checkbox"/> Pneumonie (bakt.)        | <input type="checkbox"/> Pneumonie (viral/atypisch)                  | <input type="checkbox"/> Pneumonie (sonst.)               | <input type="checkbox"/> Pleuritis (ohne Pneumonie) |
|                                                                                                                             | <input type="checkbox"/> Pneumothorax                                                                                                                                          | <input type="checkbox"/> Schlafapnoe                          |                                                                                                                                                                  |                                                   |                                                                      |                                                           |                                                     |
| <b>H8 *<br/>Nervensystem</b>                                                                                                | <input type="checkbox"/> TIA                                                                                                                                                   | <input type="checkbox"/> Schlaganfall                         | <input type="checkbox"/> ICB                                                                                                                                     | <input type="checkbox"/> Synkope                  | <input type="checkbox"/> Schwindel                                   | <input type="checkbox"/> Epilepsie                        | <input type="checkbox"/> Multiple Sklerose          |
|                                                                                                                             | <input type="checkbox"/> M. Parkinson                                                                                                                                          | <input type="checkbox"/> Demenz                               | <input type="checkbox"/> Bandscheibenvorfall                                                                                                                     | <input type="checkbox"/> Kopfschmerz              | <input type="checkbox"/> Meningitis (bakt.)                          | <input type="checkbox"/> Meningitis (viral)               | <input type="checkbox"/> Meningitis (sonst.)        |
|                                                                                                                             | <input type="checkbox"/> Restless legs                                                                                                                                         | <input type="checkbox"/> Polyneuropathie                      | <input type="checkbox"/> sonst. Neuropathie                                                                                                                      |                                                   |                                                                      |                                                           |                                                     |
| <b>H9 *<br/>Haut</b>                                                                                                        | <input type="checkbox"/> Ulcus cruris (art.)                                                                                                                                   | <input type="checkbox"/> Ulcus cruris (ven.)                  | <input type="checkbox"/> Ulcus cruris mixtum/ sonstiges Ulcus cruris                                                                                             | <input type="checkbox"/> Pyoderma gangrenosum     | <input type="checkbox"/> Malum perforans                             | <input type="checkbox"/> Dekubitus                        | <input type="checkbox"/> Erysipel/Pyodermie         |
|                                                                                                                             | <input type="checkbox"/> Herpes Zoster/ Herpes simplex                                                                                                                         | <input type="checkbox"/> Urtikaria                            | <input type="checkbox"/> Psoriasis                                                                                                                               | <input type="checkbox"/> Ekzem                    | <input type="checkbox"/> Exanthem (inkl. Arznei-, Virusexanthem)     | <input type="checkbox"/> Kutanes Lymphom (CTCL, CBCL)     | <input type="checkbox"/> Vaskulitis                 |
|                                                                                                                             | <input type="checkbox"/> Erythema exsudativum multiforme (EEM), Stevens-Johnson-Syndrom (SJS), Toxisch-epidermale-Nekrolyse (TEN), Staphylococcal scalded skin syndrome (SSSS) |                                                               | <input type="checkbox"/> Blasenbildende Autoimmundermatose (inkl. Bullöses Pemphigoid, Epidermolysis bullosa acquisita, Pemphigus vulgaris, Pemphigus foliaceus) |                                                   | <input type="checkbox"/> Lupus erythematodes (inkl. SLE, SCLE, CDLE) | <input type="checkbox"/> Sklerodermie                     | <input type="checkbox"/> CREST                      |
|                                                                                                                             | <input type="checkbox"/> Dermatomyositis                                                                                                                                       | <input type="checkbox"/> Graft versus Host Disease (GvHD)     | <input type="checkbox"/> Acne inversa                                                                                                                            |                                                   |                                                                      |                                                           |                                                     |
| <b>H10 *<br/>Bewegungsapparat</b>                                                                                           | <input type="checkbox"/> Rheum. Arthritis                                                                                                                                      | <input type="checkbox"/> Psoriasisarthritis                   | <input type="checkbox"/> Arthrose                                                                                                                                | <input type="checkbox"/> Polyarthrose             | <input type="checkbox"/> Polymyositis                                | <input type="checkbox"/> Prog. syst. Sklerose             | <input type="checkbox"/> Sjögren-Syndrom            |
| <b>H11 *<br/>Infektion</b>                                                                                                  | <input type="checkbox"/> HIV                                                                                                                                                   | <input type="checkbox"/> AIDS                                 | <input type="checkbox"/> Influenza                                                                                                                               | <input type="checkbox"/> sonst. Infektion         |                                                                      |                                                           |                                                     |
| <b>H12 *<br/>Blut</b>                                                                                                       | <input type="checkbox"/> Mangelanämie                                                                                                                                          | <input type="checkbox"/> Sichelzellanämie                     |                                                                                                                                                                  |                                                   |                                                                      |                                                           |                                                     |
| <b>H13 *<br/>Maligne Neoplasien<br/>(als Nebendiagnose erfassen, nur wenn aktiv, oder konkreter Verdacht auf Rezidiv !)</b> | <input type="checkbox"/> Gehirn                                                                                                                                                | <input type="checkbox"/> Rückenmark                           | <input type="checkbox"/> Akute Leukämie                                                                                                                          | <input type="checkbox"/> Chron. Leukämie          | <input type="checkbox"/> HNO                                         | <input type="checkbox"/> Mund                             | <input type="checkbox"/> Ösophagus                  |
|                                                                                                                             | <input type="checkbox"/> Magen                                                                                                                                                 | <input type="checkbox"/> Dünndarm                             | <input type="checkbox"/> Dickdarm (sonst.)                                                                                                                       | <input type="checkbox"/> Rektum                   | <input type="checkbox"/> Leber                                       | <input type="checkbox"/> Pankreas                         | <input type="checkbox"/> Haut                       |
|                                                                                                                             | <input type="checkbox"/> Knochen                                                                                                                                               | <input type="checkbox"/> Plasmozytom                          | <input type="checkbox"/> Niere                                                                                                                                   | <input type="checkbox"/> Harnleiter/-blase        | <input type="checkbox"/> Prostata                                    | <input type="checkbox"/> Hoden                            | <input type="checkbox"/> Brust                      |
|                                                                                                                             | <input type="checkbox"/> Uterus                                                                                                                                                | <input type="checkbox"/> Ovarien                              | <input type="checkbox"/> sonstiges                                                                                                                               |                                                   |                                                                      |                                                           |                                                     |

\*Hauptdiagnose in der Liste umkreisen, Nebendiagnosen ankreuzen Hauptdiagnose:  nicht erhebbar  sonstige Hauptdiagnose (bitte hier ausschreiben):

## Analgetische Vormedikation

Welche systemische Schmerztherapie wurde vor stationärer Aufnahme durchgeführt (feste Vormedikation)?

Hat der Patient vor seinem Krankenhausaufenthalt Opiode gegen chronische Schmerzen genommen?

ja  nein  nicht erhebbar

| A1 Nicht-Opioid | <input type="checkbox"/> keins gegeben |                             | <input type="checkbox"/> nicht erhebbar |                             |
|-----------------|----------------------------------------|-----------------------------|-----------------------------------------|-----------------------------|
|                 | p.o.                                   | i.v.                        | i.m.                                    | supp.                       |
| Celecoxib       | <input type="checkbox"/> mg            |                             |                                         |                             |
| Etoricoxib      | <input type="checkbox"/> mg            |                             |                                         |                             |
| Parecoxib       |                                        | <input type="checkbox"/> mg |                                         |                             |
| ASS             | <input type="checkbox"/> mg            | <input type="checkbox"/> mg |                                         |                             |
| Ibuprofen       | <input type="checkbox"/> mg            |                             |                                         | <input type="checkbox"/> mg |
| Diclofenac      | <input type="checkbox"/> mg            | <input type="checkbox"/> mg | <input type="checkbox"/> mg             | <input type="checkbox"/> mg |
| Indometacin     | <input type="checkbox"/> mg            |                             |                                         | <input type="checkbox"/> mg |
| Meloxicam       | <input type="checkbox"/> mg            |                             |                                         |                             |
| Naproxen        | <input type="checkbox"/> mg            |                             |                                         |                             |
| Metamizol       | <input type="checkbox"/> mg            | <input type="checkbox"/> mg | <input type="checkbox"/> mg             | <input type="checkbox"/> mg |
| Paracetamol     | <input type="checkbox"/> mg            | <input type="checkbox"/> mg | <input type="checkbox"/> mg             | <input type="checkbox"/> mg |

| A2 Opioid           | <input type="checkbox"/> keins gegeben |                             |                             |                             | <input type="checkbox"/> nicht erhebbar |                             |                             |                               |
|---------------------|----------------------------------------|-----------------------------|-----------------------------|-----------------------------|-----------------------------------------|-----------------------------|-----------------------------|-------------------------------|
|                     | p.o. unret.                            | p.o. retard                 | i.v.                        | i.m.                        | s.c.                                    | supp.                       | s.l./muco.                  | transd.                       |
| Tilidin/(Naloxon)*  | <input type="checkbox"/> mg            | <input type="checkbox"/> mg |                             |                             |                                         |                             |                             |                               |
| Tramadol            | <input type="checkbox"/> mg            | <input type="checkbox"/> mg | <input type="checkbox"/> mg | <input type="checkbox"/> mg | <input type="checkbox"/> mg             | <input type="checkbox"/> mg |                             |                               |
| Tapentadol          | <input type="checkbox"/> mg            | <input type="checkbox"/> mg |                             |                             |                                         |                             |                             |                               |
| Morphin             | <input type="checkbox"/> mg            | <input type="checkbox"/> mg | <input type="checkbox"/> mg | <input type="checkbox"/> mg | <input type="checkbox"/> mg             | <input type="checkbox"/> mg |                             |                               |
| Hydromorphon        | <input type="checkbox"/> mg            | <input type="checkbox"/> mg | <input type="checkbox"/> mg | <input type="checkbox"/> mg | <input type="checkbox"/> mg             |                             |                             |                               |
| Oxycodon            | <input type="checkbox"/> mg            | <input type="checkbox"/> mg | <input type="checkbox"/> mg | <input type="checkbox"/> mg | <input type="checkbox"/> mg             |                             |                             |                               |
| Oxycodon/(Naloxon)* | <input type="checkbox"/> mg            | <input type="checkbox"/> mg |                             |                             |                                         |                             |                             |                               |
| Buprenorphin        |                                        |                             | <input type="checkbox"/> mg | <input type="checkbox"/> mg | <input type="checkbox"/> mg             |                             | <input type="checkbox"/> mg | <input type="checkbox"/> µg/h |
| Fentanyl            | <input type="checkbox"/> µg            |                             | <input type="checkbox"/> µg | <input type="checkbox"/> µg | <input type="checkbox"/> µg             |                             | <input type="checkbox"/> µg | <input type="checkbox"/> µg/h |
| Pethidin            | <input type="checkbox"/> mg            |                             | <input type="checkbox"/> mg | <input type="checkbox"/> mg | <input type="checkbox"/> mg             | <input type="checkbox"/> mg |                             |                               |
| Piritramid          |                                        |                             | <input type="checkbox"/> mg | <input type="checkbox"/> mg | <input type="checkbox"/> mg             |                             |                             |                               |

\*Dosisangaben beziehen sich auf das Opioid

| A3 Ko-Analgetika | <input type="checkbox"/> keins gegeben |                             | <input type="checkbox"/> nicht erhebbar |                             |                             |                             |
|------------------|----------------------------------------|-----------------------------|-----------------------------------------|-----------------------------|-----------------------------|-----------------------------|
|                  | p.o.                                   | retard                      | i.v.                                    | i.m.                        | s.c.                        | supp                        |
| Pregabalin       | <input type="checkbox"/> mg            |                             |                                         |                             |                             |                             |
| Gabapentin       | <input type="checkbox"/> mg            |                             |                                         |                             |                             |                             |
| Carbamazepin     | <input type="checkbox"/> mg            | <input type="checkbox"/> mg |                                         |                             |                             |                             |
| Amitryptilin     | <input type="checkbox"/> mg            | <input type="checkbox"/> mg | <input type="checkbox"/> mg             | <input type="checkbox"/> mg | <input type="checkbox"/> mg |                             |
| Trimipramin      | <input type="checkbox"/> mg            |                             |                                         |                             |                             |                             |
| Duloxetin        | <input type="checkbox"/> mg            |                             |                                         |                             |                             |                             |
| Citalopram       | <input type="checkbox"/> mg            |                             | <input type="checkbox"/> mg             |                             |                             |                             |
| Sertralin        | <input type="checkbox"/> mg            |                             |                                         |                             |                             |                             |
| Doxepin          | <input type="checkbox"/> mg            |                             | <input type="checkbox"/> mg             | <input type="checkbox"/> mg |                             |                             |
| Lorazepam        | <input type="checkbox"/> mg            |                             | <input type="checkbox"/> mg             |                             |                             |                             |
| Diazepam         | <input type="checkbox"/> mg            |                             | <input type="checkbox"/> mg             | <input type="checkbox"/> mg |                             | <input type="checkbox"/> mg |
| Flupirtin        | <input type="checkbox"/> mg            | <input type="checkbox"/> mg | <input type="checkbox"/> mg             | <input type="checkbox"/> mg |                             | <input type="checkbox"/> mg |

andere:

## STATION

Welche systemische Schmerztherapie wurde auf der Station am Vortag (gesamte 24h des vorherigen Tages) durchgeführt?

| S1 Nicht-Opioid | <input type="checkbox"/> keins gegeben |                             |                             | <input type="checkbox"/> nicht erhebbar |                             | entspricht Vormedikation |
|-----------------|----------------------------------------|-----------------------------|-----------------------------|-----------------------------------------|-----------------------------|--------------------------|
|                 | p.o.                                   | i.v.                        | i.m.                        | supp.                                   |                             |                          |
| Celecoxib       | <input type="checkbox"/> mg            |                             |                             |                                         |                             | <input type="checkbox"/> |
| Etoricoxib      | <input type="checkbox"/> mg            |                             |                             |                                         |                             | <input type="checkbox"/> |
| Parecoxib       |                                        | <input type="checkbox"/> mg |                             |                                         |                             | <input type="checkbox"/> |
| ASS             | <input type="checkbox"/> mg            | <input type="checkbox"/> mg |                             |                                         |                             | <input type="checkbox"/> |
| Ibuprofen       | <input type="checkbox"/> mg            |                             |                             | <input type="checkbox"/> mg             |                             | <input type="checkbox"/> |
| Diclofenac      | <input type="checkbox"/> mg            | <input type="checkbox"/> mg | <input type="checkbox"/> mg | <input type="checkbox"/> mg             | <input type="checkbox"/> mg | <input type="checkbox"/> |
| Indometacin     | <input type="checkbox"/> mg            |                             |                             | <input type="checkbox"/> mg             | <input type="checkbox"/> mg | <input type="checkbox"/> |
| Meloxicam       | <input type="checkbox"/> mg            |                             |                             |                                         |                             | <input type="checkbox"/> |
| Naproxen        | <input type="checkbox"/> mg            |                             |                             |                                         |                             | <input type="checkbox"/> |
| Metamizol       | <input type="checkbox"/> mg            | <input type="checkbox"/> mg | <input type="checkbox"/> mg | <input type="checkbox"/> mg             | <input type="checkbox"/> mg | <input type="checkbox"/> |
| Paracetamol     | <input type="checkbox"/> mg            | <input type="checkbox"/> mg | <input type="checkbox"/> mg | <input type="checkbox"/> mg             | <input type="checkbox"/> mg | <input type="checkbox"/> |

| S2 Opioid           | <input type="checkbox"/> keins gegeben |                             |                             |                             |                             | <input type="checkbox"/> nicht erhebbar |                             |                               |  | entspricht Vormedikation |
|---------------------|----------------------------------------|-----------------------------|-----------------------------|-----------------------------|-----------------------------|-----------------------------------------|-----------------------------|-------------------------------|--|--------------------------|
|                     | p.o. unret.                            | p.o. retard                 | i.v.                        | i.m.                        | s.c.                        | supp.                                   | s.l./muco.                  | transd.                       |  |                          |
| Tilidin/(Naloxon)*  | <input type="checkbox"/> mg            | <input type="checkbox"/> mg |                             |                             |                             |                                         |                             |                               |  | <input type="checkbox"/> |
| Tramadol            | <input type="checkbox"/> mg            | <input type="checkbox"/> mg | <input type="checkbox"/> mg | <input type="checkbox"/> mg | <input type="checkbox"/> mg | <input type="checkbox"/> mg             |                             |                               |  | <input type="checkbox"/> |
| Tapentadol          | <input type="checkbox"/> mg            | <input type="checkbox"/> mg |                             |                             |                             |                                         |                             |                               |  | <input type="checkbox"/> |
| Morphin             | <input type="checkbox"/> mg            | <input type="checkbox"/> mg | <input type="checkbox"/> mg | <input type="checkbox"/> mg | <input type="checkbox"/> mg | <input type="checkbox"/> mg             |                             |                               |  | <input type="checkbox"/> |
| Hydromorphon        | <input type="checkbox"/> mg            | <input type="checkbox"/> mg | <input type="checkbox"/> mg | <input type="checkbox"/> mg | <input type="checkbox"/> mg | <input type="checkbox"/> mg             |                             |                               |  | <input type="checkbox"/> |
| Oxycodon            | <input type="checkbox"/> mg            | <input type="checkbox"/> mg | <input type="checkbox"/> mg | <input type="checkbox"/> mg | <input type="checkbox"/> mg | <input type="checkbox"/> mg             |                             |                               |  | <input type="checkbox"/> |
| Oxycodon/(Naloxon)* | <input type="checkbox"/> mg            | <input type="checkbox"/> mg |                             |                             |                             |                                         |                             |                               |  | <input type="checkbox"/> |
| Buprenorphin        |                                        |                             | <input type="checkbox"/> mg | <input type="checkbox"/> mg | <input type="checkbox"/> mg |                                         | <input type="checkbox"/> mg | <input type="checkbox"/> µg/h |  | <input type="checkbox"/> |
| Fentanyl            | <input type="checkbox"/> µg            |                             | <input type="checkbox"/> µg | <input type="checkbox"/> µg | <input type="checkbox"/> µg |                                         | <input type="checkbox"/> µg | <input type="checkbox"/> µg/h |  | <input type="checkbox"/> |
| Pethidin            | <input type="checkbox"/> mg            |                             | <input type="checkbox"/> mg | <input type="checkbox"/> mg | <input type="checkbox"/> mg | <input type="checkbox"/> mg             |                             |                               |  | <input type="checkbox"/> |
| Piritramid          |                                        |                             | <input type="checkbox"/> mg | <input type="checkbox"/> mg | <input type="checkbox"/> mg |                                         |                             |                               |  | <input type="checkbox"/> |

\*Dosisangaben beziehen sich auf das Opioid

| S3 Ko-Analgetika | ☐ keins gegeben             |                             | ☐ nicht erhebbar            |                             |                             |                             | entspricht<br>Vormedikation |
|------------------|-----------------------------|-----------------------------|-----------------------------|-----------------------------|-----------------------------|-----------------------------|-----------------------------|
|                  | p.o.                        | retard                      | i.v.                        | i.m.                        | supp.                       | s.c.                        |                             |
| Pregabalin       | <input type="checkbox"/> mg |                             |                             |                             |                             |                             | <input type="checkbox"/>    |
| Gabapentin       | <input type="checkbox"/> mg |                             |                             |                             |                             |                             | <input type="checkbox"/>    |
| Carbamazepin     | <input type="checkbox"/> mg | <input type="checkbox"/> mg |                             |                             |                             |                             | <input type="checkbox"/>    |
| Amitryptilin     | <input type="checkbox"/> mg | <input type="checkbox"/> mg | <input type="checkbox"/> mg | <input type="checkbox"/> mg |                             | <input type="checkbox"/> mg | <input type="checkbox"/>    |
| Trimipramin      | <input type="checkbox"/> mg |                             |                             |                             |                             |                             | <input type="checkbox"/>    |
| Duloxetin        | <input type="checkbox"/> mg |                             |                             |                             |                             |                             | <input type="checkbox"/>    |
| Citalopram       | <input type="checkbox"/> mg |                             | <input type="checkbox"/> mg |                             |                             |                             | <input type="checkbox"/>    |
| Sertralin        | <input type="checkbox"/> mg |                             |                             |                             |                             |                             | <input type="checkbox"/>    |
| Doxepin          | <input type="checkbox"/> mg |                             | <input type="checkbox"/> mg | <input type="checkbox"/> mg |                             |                             | <input type="checkbox"/>    |
| Lorazepam        | <input type="checkbox"/> mg |                             | <input type="checkbox"/> mg |                             |                             |                             | <input type="checkbox"/>    |
| Diazepam         | <input type="checkbox"/> mg |                             | <input type="checkbox"/> mg | <input type="checkbox"/> mg | <input type="checkbox"/> mg |                             | <input type="checkbox"/>    |
| Flupirtin        | <input type="checkbox"/> mg | <input type="checkbox"/> mg | <input type="checkbox"/> mg | <input type="checkbox"/> mg | <input type="checkbox"/> mg |                             | <input type="checkbox"/>    |

andere:

Ist eine Individuelle Therapieanordnung für die Schmerztherapie auf der Station vorhanden?

|                              |                             |                               |
|------------------------------|-----------------------------|-------------------------------|
| S4 Therapieanordnung         | <input type="checkbox"/> Ja | <input type="checkbox"/> Nein |
| Basisanalgesie angeordnet    | <input type="checkbox"/> Ja | <input type="checkbox"/> Nein |
| Bedarfsmedikation angeordnet | <input type="checkbox"/> Ja | <input type="checkbox"/> Nein |

Ist eine Schmerzdokumentation (z.B. Kurve) auf der Station erfolgt?

|                         |                             |                               |
|-------------------------|-----------------------------|-------------------------------|
| S5 Schmerzdokumentation | <input type="checkbox"/> Ja | <input type="checkbox"/> Nein |
|-------------------------|-----------------------------|-------------------------------|

Wurde ein spezielles Analgesieverfahren durchgeführt?

| S6 Spezielles Analgesieverfahren                                                                                                        | ☐ keine erhalten                         | ☐ nicht erhebbar                         |
|-----------------------------------------------------------------------------------------------------------------------------------------|------------------------------------------|------------------------------------------|
| <input type="checkbox"/> PCIA (intravenös)<br><input type="checkbox"/> PCA (iontophoretisch)<br><input type="checkbox"/> PCA sublingual | <input type="checkbox"/> PCEA (epidural) | <input type="checkbox"/> PCRA (regional) |
