# Supplementary material for: Anwendbarkeit von QUIKS bei stationär konservativ behandelten Tumorpatienten
Source: Springer Nature journal article supplement (doi:10.1007/s00482-021-00599-6), 2021-10-27
Supplement: MOESM2 [file 19803140]

# Qualitätsverbesserung in der Schmerztherapie konservativer (nicht-operativer) Patienten (QUIKS)

Ein Modul des QUIPS-Projekts zum Benchmarking der Schmerztherapie bei konservativen Patienten

## DEMOGRAPHIE

**D1 Nummer:** \_\_\_\_\_

(Hier bitte nur die Nummer eintragen, die für diesen Datensatz bei der webbasierten Eingabe des Fragebogens generiert wird.)

**D2 Station:** \_\_\_\_\_ **D3 Fachrichtung/Klinik:** \_\_\_\_\_

Sehr geehrte Patientin, sehr geehrter Patient,  
 wir führen an dieser Klinik eine Befragung zu gesundheitlichen Beschwerden im Rahmen stationärer Behandlungen durch. Wir möchten Sie daher höflich bitten, die folgenden Fragen zu beantworten. Die Datenerhebung ist freiwillig. Ihre persönlichen Angaben werden den behandelnden Ärztinnen und Ärzten und dem Pflegepersonal nicht zugänglich gemacht und nach Datenerfassung anonymisiert, d.h. ohne Name oder Geburtsdatum erfasst. Falls Sie sich nicht zu einer Teilnahme entschließen können, hat das keine Auswirkungen auf ihre weitere Behandlung.

Kreuzen Sie bitte auf den Skalen jeweils die Zahl an, die für Ihren Schmerz zutrifft („0“ bedeutet Schmerzfreiheit und „10“ stärkster vorstellbarer Schmerz).

**1a.** Hatten Sie **ständige Schmerzen**, die **drei Monate oder länger** andauerten, **bevor** Sie ins Krankenhaus gekommen sind?

Ja       Nein

**1b.** Falls ja, **wie stark** waren diese Schmerzen meistens?

|              |          |          |          |          |          |          |          |          |          |                                 |
|--------------|----------|----------|----------|----------|----------|----------|----------|----------|----------|---------------------------------|
| <b>0</b>     | <b>1</b> | <b>2</b> | <b>3</b> | <b>4</b> | <b>5</b> | <b>6</b> | <b>7</b> | <b>8</b> | <b>9</b> | <b>10</b>                       |
| Kein Schmerz |          |          |          |          |          |          |          |          |          | Stärkster vorstellbarer Schmerz |

**1c.** Falls ja, waren diese Schmerzen Grund für die Krankenhausaufnahme?

ja       nein       weiß nicht

**Bei den folgenden Fragen geht es um Ihre Schmerzen, die während des Aufenthalts im Krankenhaus bestanden:**

**2a.** Haben Sie bisher **während Ihres Aufenthaltes** im Krankenhaus an **einer oder mehreren** der folgenden Schmerzarten gelitten?

| <i>Bitte kreuzen Sie in der ersten Spalte die Kästchen der Schmerzarten an, die bei Ihnen zutreffen. Geben Sie bitte auch die Schmerzen an, die eventuell in keinem Zusammenhang mit ihrer aktuellen Erkrankung stehen. Dann kreuzen Sie in der zweiten Spalte an, welche der Schmerzarten für Sie am schlimmsten war/ist.</i> | <b>Ja</b><br><i>(hier alles ankreuzen, was bei Ihnen zutrifft)</i> | <b>Der schlimmste Schmerz</b><br><i>(hier bitte nur eines ankreuzen!)</i> |
|--------------------------------------------------------------------------------------------------------------------------------------------------------------------------------------------------------------------------------------------------------------------------------------------------------------------------------|--------------------------------------------------------------------|---------------------------------------------------------------------------|
| Gesichtsschmerzen                                                                                                                                                                                                                                                                                                              | <input type="checkbox"/>                                           | <input type="checkbox"/>                                                  |
| Kopfschmerzen                                                                                                                                                                                                                                                                                                                  | <input type="checkbox"/>                                           | <input type="checkbox"/>                                                  |
| Nackenschmerzen                                                                                                                                                                                                                                                                                                                | <input type="checkbox"/>                                           | <input type="checkbox"/>                                                  |
| Rücken- oder Kreuzschmerzen                                                                                                                                                                                                                                                                                                    | <input type="checkbox"/>                                           | <input type="checkbox"/>                                                  |
| Mund-/ Halsschmerzen (z.B. beim Schlucken/Essen)                                                                                                                                                                                                                                                                               | <input type="checkbox"/>                                           | <input type="checkbox"/>                                                  |
| Herzschmerzen (z.B. Angina pectoris)                                                                                                                                                                                                                                                                                           | <input type="checkbox"/>                                           | <input type="checkbox"/>                                                  |
| Schmerzen im Brustkorb (z.B. beim Husten, Atmen)                                                                                                                                                                                                                                                                               | <input type="checkbox"/>                                           | <input type="checkbox"/>                                                  |
| Bauchschmerzen                                                                                                                                                                                                                                                                                                                 | <input type="checkbox"/>                                           | <input type="checkbox"/>                                                  |
| Leistenschmerzen                                                                                                                                                                                                                                                                                                               | <input type="checkbox"/>                                           | <input type="checkbox"/>                                                  |
| Blasen- oder Nierenschmerzen                                                                                                                                                                                                                                                                                                   | <input type="checkbox"/>                                           | <input type="checkbox"/>                                                  |
| Gelenk- oder Knochenschmerzen                                                                                                                                                                                                                                                                                                  | <input type="checkbox"/>                                           | <input type="checkbox"/>                                                  |
| Muskelschmerzen                                                                                                                                                                                                                                                                                                                | <input type="checkbox"/>                                           | <input type="checkbox"/>                                                  |
| Nervenschmerzen (z.B. Ischias, Nervenverletzungen oder Polyneuropathie bei Zuckerkrankheit, Gürtelrose)                                                                                                                                                                                                                        | <input type="checkbox"/>                                           | <input type="checkbox"/>                                                  |
| Schmerzen bei Durchblutungsstörungen                                                                                                                                                                                                                                                                                           | <input type="checkbox"/>                                           | <input type="checkbox"/>                                                  |
| Wund- oder Narbenschmerzen                                                                                                                                                                                                                                                                                                     | <input type="checkbox"/>                                           | <input type="checkbox"/>                                                  |
| Schmerz bei Untersuchung, Eingriff, Punktion, Behandlung                                                                                                                                                                                                                                                                       | <input type="checkbox"/>                                           | <input type="checkbox"/>                                                  |
| Andere Schmerzen (bitte benennen): _____                                                                                                                                                                                                                                                                                       | <input type="checkbox"/>                                           | <input type="checkbox"/>                                                  |

Kreuzen Sie bitte auf den Skalen jeweils die Zahl an, die für Ihren Schmerz zutrifft („0“ bedeutet Schmerzfreiheit und „10“ stärkster vorstellbarer Schmerz).

**2b. Wie stark waren Ihre Schmerzen bei der Aufnahme ins Krankenhaus?**

|              |          |          |          |          |          |          |          |          |          |                                 |
|--------------|----------|----------|----------|----------|----------|----------|----------|----------|----------|---------------------------------|
| <b>0</b>     | <b>1</b> | <b>2</b> | <b>3</b> | <b>4</b> | <b>5</b> | <b>6</b> | <b>7</b> | <b>8</b> | <b>9</b> | <b>10</b>                       |
| Kein Schmerz |          |          |          |          |          |          |          |          |          | Stärkster vorstellbarer Schmerz |

**2c. Bitte kreuzen Sie hier den stärksten Schmerz an, den Sie seit Ihrem Krankenhausaufenthalt bei schmerzhaften Prozeduren/Maßnahmen (z.B. Untersuchung, Eingriff, Punktion, Behandlung) hatten.**

|              |          |          |          |          |          |          |          |          |          |                                 |
|--------------|----------|----------|----------|----------|----------|----------|----------|----------|----------|---------------------------------|
| <b>0</b>     | <b>1</b> | <b>2</b> | <b>3</b> | <b>4</b> | <b>5</b> | <b>6</b> | <b>7</b> | <b>8</b> | <b>9</b> | <b>10</b>                       |
| Kein Schmerz |          |          |          |          |          |          |          |          |          | Stärkster vorstellbarer Schmerz |

Die nächsten drei Fragen beziehen sich darauf, wie Ihre Schmerzen innerhalb der letzten 24 Stunden waren:

**3a. Bitte kreuzen Sie hier den Schmerz an, den Sie innerhalb der letzten 24 Stunden hatten, wenn Sie sich ruhig verhalten haben.**

|              |          |          |          |          |          |          |          |          |          |                                 |
|--------------|----------|----------|----------|----------|----------|----------|----------|----------|----------|---------------------------------|
| <b>0</b>     | <b>1</b> | <b>2</b> | <b>3</b> | <b>4</b> | <b>5</b> | <b>6</b> | <b>7</b> | <b>8</b> | <b>9</b> | <b>10</b>                       |
| Kein Schmerz |          |          |          |          |          |          |          |          |          | Stärkster vorstellbarer Schmerz |

**3b. Wie stark waren Ihre Schmerzen innerhalb der letzten 24 Stunden, wenn Sie sich belastet haben, zum Beispiel bei Mobilisierung, Bewegen, Waschen, Husten, Durchatmen?**

|              |          |          |          |          |          |          |          |          |          |                                 |
|--------------|----------|----------|----------|----------|----------|----------|----------|----------|----------|---------------------------------|
| <b>0</b>     | <b>1</b> | <b>2</b> | <b>3</b> | <b>4</b> | <b>5</b> | <b>6</b> | <b>7</b> | <b>8</b> | <b>9</b> | <b>10</b>                       |
| Kein Schmerz |          |          |          |          |          |          |          |          |          | Stärkster vorstellbarer Schmerz |

**3c. Bitte kreuzen Sie hier den stärksten Schmerz an, den Sie innerhalb der letzten 24h hatten.**

|              |          |          |          |          |          |          |          |          |          |                                 |
|--------------|----------|----------|----------|----------|----------|----------|----------|----------|----------|---------------------------------|
| <b>0</b>     | <b>1</b> | <b>2</b> | <b>3</b> | <b>4</b> | <b>5</b> | <b>6</b> | <b>7</b> | <b>8</b> | <b>9</b> | <b>10</b>                       |
| Kein Schmerz |          |          |          |          |          |          |          |          |          | Stärkster vorstellbarer Schmerz |

Die nächsten vier Fragen beziehen sich darauf, ob bestimmte Tätigkeiten oder Ihre Stimmung innerhalb der letzten 24 Stunden durch den Schmerz beeinträchtigt waren. Mit „beeinträchtigt“ ist gemeint: die Tätigkeit ist unmöglich oder nur unter großer Mühe möglich. Waren Sie durch die Schmerzen beeinträchtigt:

**4a. bei Bewegung?**

- Ja  Nein

**4b. beim Husten oder tiefen Luftholen?**

- Ja  Nein

**4c. beim Schlafen?**

- Ja  Nein

**4d. in Ihrer Stimmung?**

- Ja  Nein

Die nächsten 4 Fragen beziehen sich auf Ihren **Allgemeinzustand** in den letzten 24 Stunden:

5a. Haben Sie sich sehr **müde** gefühlt?

- Ja       Nein

5b. Haben Sie unter **Übelkeit** gelitten?

- Ja       Nein

5c. Haben Sie unter **Schwindel** gelitten?

- Ja       Nein

5d. Leiden Sie derzeit unter Verstopfung?

- Ja       Nein

6. Wurden Sie über die verschiedenen **Möglichkeiten Ihrer Schmerztherapie** informiert?

- Ja       Nein

7. Hätten Sie gewünscht, **mehr Mittel gegen Schmerzen** zu bekommen?

- Ja       Nein

8. Wenn Sie Schmerzen während Ihres Aufenthaltes im Krankenhaus hatten bzw. Schmerztherapie erhalten haben (z.B. Medikamente, Schmerzsalben, Schmerzkatheter, Krankengymnastik, Wärme, Kälte, Gespräch usw.) kreuzen Sie bitte an, wie **zufrieden** Sie mit dem Ergebnis der Behandlung Ihrer Schmerzen sind.

|          |          |          |          |          |          |          |          |          |          |           |
|----------|----------|----------|----------|----------|----------|----------|----------|----------|----------|-----------|
| <b>0</b> | <b>1</b> | <b>2</b> | <b>3</b> | <b>4</b> | <b>5</b> | <b>6</b> | <b>7</b> | <b>8</b> | <b>9</b> | <b>10</b> |
|----------|----------|----------|----------|----------|----------|----------|----------|----------|----------|-----------|

Völlig  
unzufrieden

Sehr zufrieden

Ich hatte keine Schmerzursache/nie Schmerzen und habe auch keine Schmerzbehandlung erhalten.

-----  
Vom Befragenden auszufüllen:

Patient wurde interviewt:

Ja

Nein
